# Supplementary material
Source: Springer Nature journal article supplement (https://www.springermedizin.de/resource/supplementary/13063_2013_1883_MOESM1_ESM.pdf/9620424)
Supplement: MOESM1 [file 9620424]

# AngioSeal Versus Radial Approach In Acute Coronary SyndromE

## ARISE

Non-ST-segment elevation acute coronary syndrome patients with an intended invasive strategy

n=200  
Randomization 1:1

Radial Approach  
TR Band™

Femoral Approach  
AngioSeal™

Primary Endpoint: Access site complications at 30 days
